# Supplementary material for: How Do Midwives View Their Professional Autonomy, Now and in Future?
Source: MDPI journal article supplement (doi:10.3390/healthcare11121800), 2023-06-19
Supplement: s1 [file s1]

|                                                                                                                                                                                    |
|------------------------------------------------------------------------------------------------------------------------------------------------------------------------------------|
| <b>Supplementary file 2: Questionnaire</b>                                                                                                                                         |
| <b>Dimension: Work content</b>                                                                                                                                                     |
| I can independently take decisions                                                                                                                                                 |
| I can act independently                                                                                                                                                            |
| I have control over my own work                                                                                                                                                    |
| I get responsibility in the course of my duties                                                                                                                                    |
| I can do my work according to the professional profile and the relevant legislation                                                                                                |
| <b>Dimension: Professionalism of the midwife</b>                                                                                                                                   |
| I can take responsibility for my own tasks and decisions                                                                                                                           |
| I am responsible and liable for my actions and decisions                                                                                                                           |
| I have expertise to act autonomously                                                                                                                                               |
| I feel competent to act autonomously                                                                                                                                               |
| I have authority to act autonomously                                                                                                                                               |
| <b>Dimension: Relationship with others</b>                                                                                                                                         |
| I am not supervised by doctors or other health professionals                                                                                                                       |
| I am recognised by society                                                                                                                                                         |
| I am professionally recognised                                                                                                                                                     |
| Other health professionals in maternity care respect the role of the midwife                                                                                                       |
| A legitimately established professional association of midwives defines the rules governing the exercise of their profession. This in consultation with the competent authorities. |
| <b>Midwives' views about their autonomy and their views about their autonomy in the future.</b>                                                                                    |
| How do you generally rate your autonomy as a midwife?                                                                                                                              |
| To what extent do you think that a midwife should be able to work autonomously in Belgium in the nearby future? (regardless of your current work situation)                        |
