# Supplementary material for: How Do Midwives View Their Professional Autonomy, Now and in Future?
Source: MDPI journal article supplement (doi:10.3390/healthcare11121800), 2023-06-19
Supplement: s1 [file s1]

## Supplementary file 3: Determination of the internal consistency and construct validity of the autonomy questionnaire

### Contents

|                                       |    |
|---------------------------------------|----|
| Procedure .....                       | 1  |
| Visual inspection.....                | 2  |
| Reliability .....                     | 3  |
| Work content.....                     | 3  |
| Professionalism of the midwife .....  | 4  |
| Relationship with others.....         | 5  |
| Overarching scale .....               | 6  |
| Construct validity.....               | 9  |
| Model 1: Model with 3 dimensions..... | 11 |
| Model 2: Hierarchic model .....       | 13 |
| Model 3: Single dimension .....       | 15 |
| Adaptation basic models .....         | 18 |
| Additional analyses.....              | 23 |
| Conclusion .....                      | 23 |

### Procedure

The following analyses were performed in the R programming environment. <sup>1</sup> The visual inspection of the distribution of the items demonstrated that that data were not normally distributed. Secondly, a reliability analysis on each scale's dimension, namely 'work content', 'professionalism of the midwife' and 'relationship with others' was performed using the psych package in R. <sup>2</sup> Cronbach's alpha was used as a measure of internal consistency, as a measure for the reliability of each scale. <sup>3</sup> To consider scale or its dimensions appropriateness, the alpha needed to reach minimal .70, However, .80 is mostly being considered as a good internal consistency rate. The internal consistencies of both 'work content' and 'professionalism of the midwife' were considered good ( $\alpha_{workcontent} = 0.80, \alpha_{professionalism} = 0.81$ ), while the dimension 'relationship to others' reached no acceptable internal consistency rate ( $\alpha_{relation to others} = 0.50$ ). Dropping an item did not yielded any noteworthy improvement in the alpha coefficient. An item inspection revealed that the items of this subscale are too heterogeneous because of which the scale is not internally consistent.

Next, construct validity of the scale was assessed. Different Confirmatory Factor Analyses (CFA) models were drafted to determine which model fits best the data. <sup>1</sup> As the analyses require structural equation

modelling, data were analysed with the R-package lavaan.<sup>4</sup> The lavaan output contains different fit indices, which allow to evaluate how well the model fits the data. Stated differently, is the model adequate to explain the data? First, if the chi-square test is non-significant, the model fit is considered acceptable since the observed covariance matrix is considered similar to the model-implied covariance matrix. The Comparative Fit Index (CFI) is suitable for small ( $n < 100$ ) sample sizes (Bentler, 1989). It is advised that the CFI exceeds .90 or, ideally, .95. Next, a value of the Tucker Lewis Index (TLI) between .90 and .95 is considered as a marginal fit, values exceeding .95 represent a good fit (Kenny, 2014). Concerning the Root Mean-Square Error of Approximation (RMSEA) a value below 0.04 describes a good fit and below 0.08 a moderate fit (Kline, 2010).

Next, it was verified per construct if the standardized factor loadings exceed .50. A Maximum Likelihood (ML) estimator resulted in a suboptimal model fit, which is due to the fact that continuous normally distributed data are needed. However, because a 4-point Likert scale was used and as data were skewed, we opted to use the Diagonally Weighted Least Squares (DWLS) estimator, which resulted in good model fits. The detailed results of these CFA models is included in Appendix 1. In sum, the CFA's including three dimensions consistently revealed too low standardized factor loadings for the relationship with others-dimension, indicating that these items cannot be considered good indicators of this latent scale. When excluding this scale from the model, good model fits and standardized factor loadings were consistently obtained.

## Visual inspection

The distribution of the variables is looked at.

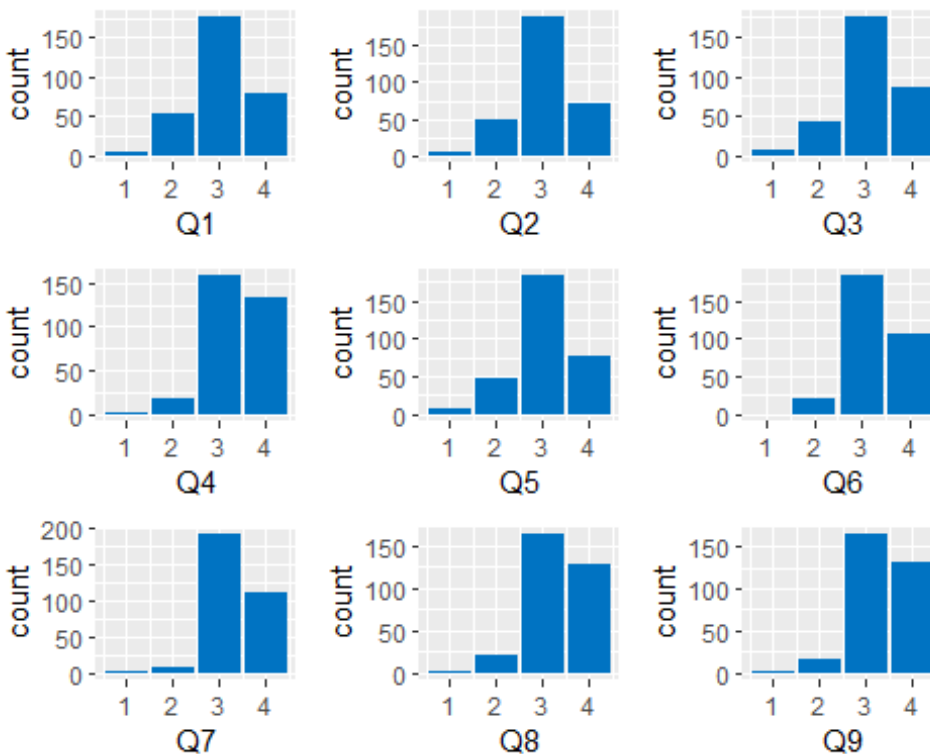

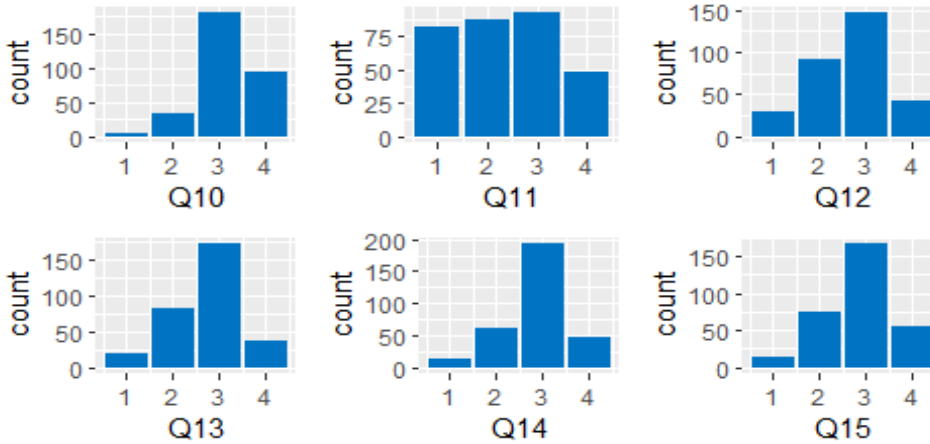

The graphs above show that the data was measured on a 4-point scale and that data are not normally distributed. This is not ideal, this needs to be taken into account.

## Reliability

The reliability is then checked on a scale-by-scale basis. Cronbach's alpha is used as a measure for internal consistency. The alpha is ideally above .70 to consider the scale as acceptable. From .80 the internal consistency is considered good.

### Work content

```
##
## Reliability analysis
## Call: alpha(x = cbind(rb[, 5], rb[, 6], rb[, 7], rb[, 8], rb[, 9]))
##
## raw_alpha std.alpha G6(smc) average_r S/N          ase mean sd median_r
#           0.8         0.8         0.78         0.45         4 0.018 3.1 0.5         0.44
##
## lower alpha upper          95% confidence boundaries
## 0.76 0.8 0.83
##
## Reliability if an item is dropped:
## raw_alpha std.alpha G6(smc) average_r S/N alpha se var.r med.r
## V1  0.73 0.73 0.68 0.41 2.7 0.025 0.0049 0.43
## V2  0.75 0.75 0.70 0.43 3.0 0.023 0.0060 0.45
## V3  0.78 0.78 0.75 0.47 3.6 0.020 0.0107 0.47
## V4  0.75 0.75 0.71 0.43 3.0 0.023 0.0144 0.41
## V5  0.79 0.79 0.75 0.49 3.8 0.019 0.0067 0.46
##
## Item statistics
```

```
## n raw.r std.r r.cor r.drop mean sd
## V1 312 0.81 0.81 0.76 0.67 3.1 0.69
## V2 312 0.77 0.77 0.70 0.62 3.0 0.67
## V3 312 0.71 0.70 0.58 0.52 3.1 0.71
## V4 312 0.76 0.77 0.69 0.62 3.4 0.62
## V5 312 0.68 0.68 0.55 0.48 3.1 0.68
##
## Non missing response frequency for each item
##      1      2      3      4 miss
## [1,] 0.02 0.17 0.56 0.25      0

## [2,] 0.02 0.15 0.61 0.22      0

## [3,] 0.03 0.13 0.56 0.28      0

## [4,] 0.01 0.06 0.51 0.43      0

## [5,] 0.02 0.15 0.59 0.25      0
```

A Cronbach's alpha of .80 is observed. This is acceptable, the scale is internally consistent.

### Professionalism of the midwife

```
##
## Reliability analysis
## Call: alpha(x = cbind(rb[, 10], rb[, 11], rb[, 12], rb[, 13], rb[,
##      14]))
##
##      raw_alpha std.alpha G6(smc) average_r S/N      ase mean      sd median_r
##      0.81      0.81      0.8      0.45 4.1 0.018 3.3 0.45      0.42
##
## lower alpha upper      95% confidence boundaries
## 0.77 0.81 0.84
## Reliability if an item is dropped:
##      raw_alpha std.alpha G6(smc) average_r S/N alpha se var.r med.r
## V1  0.78  0.78  0.75  0.47 3.5      0.020 0.021 0.48
## V2  0.79  0.79  0.76  0.49 3.8      0.019 0.015 0.49
## V3  0.77  0.77  0.74  0.45 3.3      0.022 0.011 0.42
## V4  0.74  0.74  0.71  0.41 2.8      0.025 0.016 0.36
## V5  0.76  0.76  0.75  0.45 3.2      0.022 0.020 0.42
##
## Item statistics
## n raw.r std.r r.cor r.drop mean sd
## V1 312 0.72 0.73 0.64 0.55 3.3 0.58
## V2 312 0.68 0.70 0.59 0.51 3.3 0.55
## V3 312 0.76 0.75 0.68 0.60 3.3 0.61
```

```
## V4 312 0.82 0.81 0.77 0.69 3.4 0.59
## V5 312 0.78 0.76 0.68 0.61 3.2 0.66
##
## Non missing response frequency for each item
##      1      2      3      4 miss
## [1,] 0.00 0.06 0.59 0.35      0

## [2,] 0.01 0.03 0.61 0.36      0

## [3,] 0.00 0.07 0.52 0.41      0

## [4,] 0.00 0.05 0.53 0.42      0

## [5,] 0.01 0.11 0.58 0.30      0
```

A Cronbach's alpha of .80 is observed. This is acceptable, the scale is internally consistent.

### Relationship with others

```
##
## Reliability analysis
## Call: alpha(x = cbind(rb[, 15], rb[, 16], rb[, 17], rb[, 18], rb[,
##      19]))
##
##      raw_alpha std.alpha G6(smc) average_r S/N      ase mean      sd median_r
##      0.5      0.53      0.53      0.18 1.1 0.046 2.7 0.47      0.09
##
## lower alpha upper      95% confidence boundaries
## 0.41 0.5 0.58 ##
## Reliability if an item is dropped:
##      raw_alpha std.alpha G6(smc) average_r S/N alpha se var.r med.r
## V1  0.59   0.59   0.57   0.27 1.45   0.037 0.043 0.239
## V2  0.33   0.36   0.33   0.12 0.56   0.062 0.018 0.083
## V3  0.32   0.35   0.32   0.12 0.54   0.063 0.014 0.090
## V4  0.41   0.43   0.45   0.16 0.77   0.056 0.043 0.086
## V5  0.51   0.56   0.55   0.24 1.28   0.047 0.053 0.213
##
## Item statistics
## n raw.r std.r r.cor r.drop mean sd
## V1 312 0.51 0.42 0.11 0.084 2.3 1.03
## V2 312 0.69 0.71 0.67 0.425 2.7 0.84
## V3 312 0.69 0.72 0.69 0.459 2.7 0.75
## V4 312 0.58 0.63 0.48 0.333 2.9 0.69
## V5 312 0.45 0.47 0.19 0.146 2.9 0.75
##
## Non missing response frequency for each item
```

```
##      1      2      3      4 miss
## [1,] 0.27 0.28 0.30 0.15      0

## [2,] 0.10 0.29 0.47 0.14      0

## [3,] 0.06 0.27 0.55 0.12      0

## [4,] 0.04 0.20 0.62 0.15      0

## [5,] 0.04 0.24 0.54 0.18      0
```

A Cronbach's alpha of .50 is observed. This is problematic, this scale is not internally consistent. The removal of an item does not lead to a notable increase in the Cronbach's alpha (see reliability if an item is removed).

### Overarching scale

Next, it is determined whether the aggregation of all items leads to an overarching reliable scale.

```
##
## Reliability analysis
## Call: alpha(x = cbind(rb[, 5], rb[, 6], rb[, 7], rb[, 8], rb[, 9],
##                      rb[, 10], rb[, 11], rb[, 12], rb[, 13], rb[, 14], rb[, 15],
##                      rb[, 16], rb[, 17], rb[, 18], rb[, 19]))
##
##      raw_alpha std.alpha G6(smc) average_r S/N      ase mean      sd median_r
##      0.83      0.85      0.88      0.27 5.6 0.014      3 0.39      0.26
##
## lower alpha upper      95% confidence boundaries
## 0.81 0.83 0.86 ##
## Reliability if an item is dropped:
##      raw_alpha std.alpha G6(smc) average_r S/N alpha se var.r med.r
## V1 0.81 0.83 0.86 0.26 4.9 0.015 0.024 0.23
## V2 0.82 0.84 0.86 0.27 5.1 0.015 0.025 0.23
## V3 0.82 0.84 0.87 0.27 5.1 0.015 0.025 0.24
## V4 0.81 0.83 0.86 0.26 4.8 0.015 0.024 0.22
## V5 0.82 0.84 0.87 0.27 5.1 0.015 0.027 0.23
## V6 0.82 0.83 0.86 0.26 4.8 0.015 0.024 0.23
## V7 0.82 0.83 0.86 0.26 5.0 0.015 0.026 0.22
## V8 0.83 0.84 0.87 0.27 5.2 0.015 0.025 0.26
## V9 0.82 0.83 0.86 0.26 5.0 0.015 0.024 0.23
## V10 0.82 0.83 0.86 0.26 4.9 0.015 0.026 0.22
## V11 0.83 0.84 0.87 0.27 5.3 0.014 0.025 0.26
## V12 0.83 0.85 0.87 0.28 5.5 0.014 0.025 0.30
## V13 0.83 0.84 0.87 0.28 5.4 0.014 0.026 0.30
## V14 0.83 0.85 0.88 0.29 5.6 0.014 0.026 0.30
## V15 0.85 0.86 0.88 0.30 6.0 0.013 0.021 0.31
```

```

##
## Item statistics
## n raw.r std.r r.cor r.drop mean sd
## V1 312 0.68 0.68 0.67 0.61 3.1 0.69
## V2 312 0.61 0.61 0.59 0.53 3.0 0.67
## V3 312 0.60 0.59 0.56 0.51 3.1 0.71
## V4 312 0.69 0.71 0.70 0.63 3.4 0.62
## V5 312 0.60 0.60 0.56 0.52 3.1 0.68
## V6 312 0.69 0.71 0.70 0.63 3.3 0.58
## V7 312 0.62 0.64 0.61 0.56 3.3 0.55
## V8 312 0.52 0.55 0.52 0.44 3.3 0.61
## V9 312 0.61 0.64 0.62 0.54 3.4 0.59
## V10 312 0.65 0.67 0.64 0.58 3.2 0.66
## V11 312 0.56 0.52 0.47 0.42 2.3 1.03
## V12 312 0.45 0.43 0.38 0.32 2.7 0.84
## V13 312 0.51 0.50 0.46 0.40 2.7 0.75
## V14 312 0.40 0.40 0.33 0.30 2.9 0.69
## V15 312 0.25 0.23 0.13 0.12 2.9 0.75
##
## Non missing response frequency for each item
##      1      2      3      4 miss ##
[1,]    0.02 0.17 0.56 0.25    0

## [2,] 0.02 0.15 0.61 0.22    0

## [3,] 0.03 0.13 0.56 0.28    0

## [4,] 0.01 0.06 0.51 0.43    0

## [5,] 0.02 0.15 0.59 0.25    0

## [6,] 0.00 0.06 0.59 0.35    0

## [7,] 0.01 0.03 0.61 0.36    0

## [8,] 0.00 0.07 0.52 0.41    0

## [9,] 0.00 0.05 0.53 0.42    0

## [10,] 0.01 0.11 0.58 0.30    0

## [11,] 0.27 0.28 0.30 0.15    0

## [12,] 0.10 0.29 0.47 0.14    0

```

```
## [13,] 0.06 0.27 0.55 0.12    0
```

```
## [14,] 0.04 0.20 0.62 0.15    0
```

```
## [15,] 0.04 0.24 0.54 0.18    0
```

A Cronbach's alpha of .83 is observed. This is acceptable, this scale is internally consistent.

What about an overarching scale based on only professionalism and work content (i.e. without relationship with others)?

```
##
```

```
## Reliability analysis
```

```
## Call: alpha(x = cbind(rb[, 5], rb[, 6], rb[, 7], rb[, 8], rb[, 9],
```

```
##           rb[, 10], rb[, 11], rb[, 12], rb[, 13], rb[, 14]))
```

```
##
```

```
##      raw_alpha std.alpha G6(smc) average_r S/N      ase mean      sd median_r
```

```
##      0.86      0.87      0.88      0.39 6.4 0.012 3.2 0.43      0.38
```

```
##
```

```
## lower alpha upper      95% confidence boundaries
```

```
## 0.84 0.86 0.89 ##
```

```
## Reliability if an item is dropped:
```

```
##      raw_alpha std.alpha G6(smc) average_r S/N alpha se var.r med.r
```

```
## V1  0.85      0.85      0.86      0.38 5.6      0.013 0.0136 0.36
```

```
## V2  0.85      0.86      0.86      0.40 5.9      0.013 0.0129 0.39
```

```
## V3  0.86      0.86      0.87      0.40 6.0      0.012 0.0130 0.38
```

```
## V4  0.84      0.85      0.86      0.38 5.5      0.013 0.0137 0.35
```

```
## V5  0.86      0.86      0.87      0.40 6.1      0.012 0.0141 0.39
```

```
## V6  0.84      0.85      0.86      0.38 5.5      0.013 0.0134 0.36
```

```
## V7  0.85      0.85      0.87      0.39 5.8      0.013 0.0142 0.39
```

```
## V8  0.86      0.86      0.87      0.41 6.2      0.012 0.0093 0.39
```

```
## V9  0.85      0.85      0.86      0.39 5.8      0.013 0.0121 0.38
```

```
## V10 0.85      0.85      0.87      0.39 5.8      0.013 0.0141 0.37
```

```
##
```

```
## Item statistics
```

```
## n raw.r std.r r.cor r.drop mean sd
```

```
## V1 312 0.73 0.72 0.69 0.64 3.1 0.69
```

```
## V2 312 0.66 0.65 0.61 0.56 3.0 0.67
```

```
## V3 312 0.64 0.62 0.56 0.52 3.1 0.71
```

```
## V4 312 0.75 0.75 0.72 0.67 3.4 0.62
```

```
## V5 312 0.62 0.61 0.54 0.50 3.1 0.68
```

```
## V6 312 0.74 0.75 0.73      0.67 3.3 0.58
```

```
## V7 312 0.65 0.67 0.62      0.57 3.3 0.55
```

```
## V8 312 0.58 0.59 0.55      0.48 3.3 0.61
```

```
## V9 312 0.67 0.68 0.65      0.58 3.4 0.59
```

```
## V10 312 0.68 0.68 0.64      0.59 3.2 0.66
```



```
##
## Non missing response frequency for each item
##      1      2      3      4 miss
## [1,] 0.02 0.17 0.56 0.25      0
## [2,] 0.02 0.15 0.61 0.22      0
## [3,] 0.03 0.13 0.56 0.28      0
## [4,] 0.01 0.06 0.51 0.43      0
## [5,] 0.02 0.15 0.59 0.25      0
## [6,] 0.00 0.06 0.59 0.35      0
## [7,] 0.01 0.03 0.61 0.36      0
## [8,] 0.00 0.07 0.52 0.41      0
## [9,] 0.00 0.05 0.53 0.42      0
## [10,] 0.01 0.11 0.58 0.30      0
```

A slightly increased Cronbach's alpha is observed. This scale is likewise internally consistent.

### Construct validity

Then is checked whether there is evidence of the construct validity of the proposed scales. For this purpose, different CFA models are developed to determine which model best fits the data.

Model 1:

- The indicators for the latent variable work content are: Q1, Q2, Q3, Q4 and Q5
- The indicators for the latent variable professionalism are: Q6, Q7, Q8, Q9 and Q10
- The indicators for the latent variable relationship with others are: Q11, Q12, Q13, Q14 and Q15

Model 2 is similar to model 1 but is also a hierarchical structure where work content, professionalism and relationship with others are referred to as indicators of an overarching construct 'autonomy'.

Model 3 is a single factor CFA (i.e., 1 underlying construct is modelled) where all items serve as indicators for the latent construct autonomy (cfr. overarching construct).

```
library(lavaan)
# Model 1: model with 3 dimensions
aut <- '
  wc =~ Q1 + Q2 + Q3 + Q4 + Q5
  prof =~ Q6 + Q7 + Q8 + Q9 + Q10
  relationship to others =~ Q11 + Q12 + Q13 + Q14 + Q15
'
```

```
# Model 2: hierarchic model
```

```
hier <- '
```

```
  wc =~ Q1 + Q2 + Q3 + Q4 + Q5 prof =~ Q6 +  
  Q7 + Q8 + Q9 + Q10 relationship with  
  others =~ Q11 + Q12 + Q13 + Q14 + Q15  
  aut =~ wc + prof + relationship with others  
,
```

```
# Model 3: single dimension
```

```
one <- '
```

```
  aut =~ Q1 + Q2 + Q3 + Q4 + Q5 + Q6 + Q7 + Q8 + Q9 + Q10 + Q11 + Q12 + Q13 +  
        Q14 + Q15  
,
```

We note that using a Maximum Likelihood (ML) estimator yielded suboptimal results in terms of model fit, this is due to the fact that when using this estimator, continuous normally distributed data are required. However, because only a 4-point Likert scale was used and data were skewed, we opted to use the Diagonally Weighted Least Squares (DWLS) estimator, which resulted in good model fits. The detailed results of these CFA models are included in the additional appendix.

In sum, the CFA's including three dimensions consistently revealed too low standardized factor loadings for the relationship with others-dimension, indicating that these items cannot be considered good indicators of this latent scale. When excluding this scale from the model, good model fits and standardized factor loadings were consistently obtained.

Each of these models is now being evaluated for the model fit. The following conventional rules are used in the evaluation of the model fit. A good model fit meets the following criteria:

- p-value van de chi-square <.05
- CFI > .95
- TLI > .95
- RMSEA < .05
- SRMR < .05

For an acceptable fit, the following criteria apply:

- .90 > CFI > .95
- .90 > TLI > .95
- .05 < RMSEA < .10
- .05 < SRMR < .08

In addition, the standardized factor loads (see below in output the Std.all-column in the Latent Variables section) were also examined if they were more than .50.

Data were analysed using R. <sup>1</sup> As the analyses require structural equation modelling, data were analysed with the R-package lavaan. <sup>4</sup> The lavaan output contains different fit indices, which allow to evaluate how well the proposed model fits the data. First, if the chi-square is not significant, the model fit is considered acceptable since the observed covariance matrix is considered similar to the model-implied covariance matrix. However, this test only seems appropriate for small samples as it will falsely result in a significant result with larger samples. The Comparative Fit Index (CFI) is suitable for small ( $n < 100$ ) sample sizes. <sup>5</sup> It is advised that the CFI exceeds .90 or, ideally, .95. <sup>6</sup> Next, a value of the Tucker Lewis Index (TLI) between .90 and .95 is considered as a marginal fit, values exceeding .95 represent a good fit. <sup>7</sup> Concerning the Root Mean-Square Error of Approximation (RMSEA) a value below 0.04 describes a good fit and below 0.08 a moderate fit. <sup>8</sup> Next, it is inspected per construct if the standardized factor loadings exceed .60.

### Model 1: Model with 3 dimensions

```
# Model 1: model met 3 dimensions
```

```
fit_3dimo <- cfa(aut, data = rb, estimator = "DWLS")
summary(fit_3dimo, fit.measures = T, standardized = T)
```

```
## lavaan 0.6-11 ended normally after 58 iterations ##
```

```
##      Estimator                      DWLS
##      Optimization method          NLMINB
##      Number of model parameters          33
##
##      Number of observations          312
##
## Model Test User Model:
##
##      Test statistic                216.827
##      Degrees of freedom              87
##      P-value (Chi-square)           0.000
##
## Model Test Baseline Model:
##
##      Test statistic                2697.688
##      Degrees of freedom             105
```

```

##
##
P-value 0.000

## User Model versus Baseline Model:
##
## Comparative Fit Index (CFI) 0.950 ## Tucker-Lewis
Index (TLI) 0.940
##
## Root Mean Square Error of Approximation:
##
## RMSEA 0.069
## 90 Percent confidence interval - lower 0.058
## 90 Percent confidence interval - upper 0.081
## P-value RMSEA <= 0.05 0.004
##
## Standardized Root Mean Square Residual:
##
## SRMR 0.086
##
## Parameter Estimates:
##
## Standard errorsStandard
## Information Expected
## Information saturated (h1) model Unstructured
##
## Latent Variables:
## Estimate Std.Err z-value P(>|z|) Std.lv Std.all
## wc =~
## Q1 1.000 0.500 0.720
## Q2 0.840 0.061 13.675 0.000 0.420 0.631
## Q3 0.865 0.062 13.926 0.000 0.432 0.606
## Q4 0.948 0.064 14.798 0.000 0.474 0.764
## Q5 0.831 0.060 13.741 0.000 0.416 0.607
## prof =~
## Q6 1.000 0.446 0.775
## Q7 0.822 0.056 14.761 0.000 0.367 0.662
## Q8 0.723 0.055 13.161 0.000 0.323 0.525
## Q9 0.857 0.060 14.197 0.000 0.382 0.643
## Q10 0.965 0.068 14.302 0.000 0.431 0.656
##relationship to others =~
## Q11 1.000 0.603 0.584
## Q12 0.485 0.057 8.583 0.000 0.293 0.350
## Q13 0.558 0.058 9.684 0.000 0.337 0.447
## Q14 0.384 0.048 7.989 0.000 0.232 0.333
## Q15 0.166 0.044 3.811 0.000 0.100 0.133
##
## Covariances:
##

```

```

##               Estimate Std.Err z-value P(>|z|)           Std.lv Std.all
##   wc ~~~
## prof 0.179 0.012 15.202 0.000 0.804 0.804 ## relationship with others 0.237 0.020
11.874 0.000 0.785 0.785
##   prof ~~~
##relationship to others    0.191    0.017   11.507    0.000    0.709    0.709
##
## Variances:
               Estimate Std.Err z-value P(>|z|)           Std.lv Std.all
.Q1    0.233 0.046 5.091 0.000 0.233 0.482
## .Q2 0.266 0.043 6.214 0.000 0.266 0.601
## .Q3 0.322 0.049 6.600 0.000 0.322 0.633
## .Q4 0.161 0.038 4.174 0.000 0.161 0.417
## .Q5 0.296 0.045 6.651 0.000 0.296 0.632
## .Q6 0.133 0.029 4.585 0.000 0.133 0.400
## .Q7 0.173 0.031 5.487 0.000 0.173 0.562
## .Q8 0.273 0.031 8.750 0.000 0.273 0.724
## .Q9 0.208 0.031 6.619 0.000 0.208 0.587
## .Q10 0.245 0.042 5.819 0.000 0.245 0.569
## .Q11 0.703 0.084 8.421 0.000 0.703 0.659
## .Q12 0.612 0.053 11.638 0.000 0.612 0.877
## .Q13 0.454 0.050 9.000 0.000 0.454 0.800
## .Q14 0.429 0.046 9.414 0.000 0.429 0.889
## .Q15 0.560 0.045 12.570 0.000 0.560 0.982
## wc 0.250 0.025 10.197 0.000 1.000 1.000
## prof 0.199 0.018 11.040 0.000 1.000 1.000
##relationship to others    0.364    0.063   5.822    0.000    1.000    1.000

```

The model fit is on the edge. When inspecting the standardized factor loads, one see that these are far too low for the third dimension (relationship with others). This model is not usable.

## Model 2: Hierarchic model

```

fit_hiero <- cfa(hier, data = rb, estimator = "DWLS") summary(fit_hiero,
  fit.measures = T, standardized = T)

```

```

## lavaan 0.6-11 ended normally after 46 iterations ##
##   Estimator                               DWLS
##   Optimization method                     NLMINB
##   Number of model parameters                33
##
##   Number of observations                    312
##
## Model Test User Model:
##
##

```

```

##
##

##      Test statistic                216.827
##      Degrees of freedom              87
##      P-value (Chi-square)           0.000
##
## Model Test Baseline Model:
##
##      Test statistic                2697.688
##      Degrees of freedom              105
##      P-value                        0.000
##
## User Model versus Baseline Model:
##
##      Comparative Fit Index (CFI)      0.950
##      Tucker-Lewis Index (TLI)        0.940

## Root Mean Square Error of Approximation:
##
##      RMSEA 0.069
##      90 Percent confidence interval - lower 0.058
##      90 Percent confidence interval - upper 0.081
##      P-value RMSEA <= 0.05           0.004
##
## Standardized Root Mean Square Residual:
##
##      SRMR                          0.086
##
## Parameter Estimates:
##
##      Standard errorsStandard
##      Information Expected
##      Information saturated (h1) model      Unstructured
##
## Latent Variables:
##      Estimate Std.Err z-value P(>|z|)      Std.lv Std.all
##      wc =~
##      Q1                1.000                0.500    0.720
##      Q2 0.840 0.061 13.675 0.000 0.420 0.631
##      Q3 0.865 0.062 13.926 0.000 0.432 0.606
##      Q4 0.948 0.064 14.798 0.000 0.474 0.764
##      Q50.831 0.060 13.741 0.0000.416 0.607
##      prof =~
##      Q6                1.000                0.446    0.775
##      Q7 0.822 0.056 14.761 0.000 0.367 0.662
##      Q8 0.723 0.055 13.161 0.000 0.323 0.525
##      Q9 0.857 0.060 14.197 0.000 0.382 0.643
##      Q10 0.965 0.068 14.302 0.000 0.431 0.656
##relationship to others =~
##      Q11                1.000                0.603    0.584

```

```

## Q12 0.485 0.057 8.583 0.000 0.293 0.350
## Q13 0.558 0.058 9.684 0.000 0.337 0.447
## Q14 0.384 0.048 7.989 0.000 0.232 0.333
## Q150.166          0.044   3.811   0.000   0.100   0.133
##   aut =~
##   wc          1.000          0.943   0.943
##   prof        0.806   0.083   9.666   0.000   0.852   0.852
##relationship to others  1.065   0.101  10.539   0.000   0.832   0.832
##
## Variances:
## Estimate Std.Err z-value P(>|z|) Std.lv Std.all
## .Q1 0.233 0.046 5.091 0.000 0.233 0.482
## .Q2 0.266 0.043 6.214 0.000 0.266 0.601
## .Q3 0.322 0.049 6.600 0.000 0.322 0.633
## .Q4 0.161 0.038 4.174 0.000 0.161 0.417
## .Q5 0.296 0.045 6.651 0.000 0.296 0.632
## .Q6 0.133 0.029 4.585 0.000 0.133 0.400
## .Q7 0.173 0.031 5.487 0.000 0.173 0.562
## .Q8 0.273 0.031 8.750 0.000 0.273 0.724
## .Q90.208 0.031 6.619 0.000. 208 0.587
## .Q10 0.245 0.042 5.819 0.000 0.245 0.569
## .Q110.703 0.084 8.421 0.000 0.703 0.659
## .Q120.612 0.053 11.638 0.000 0.612 0.877
## .Q130.454 0.050 9.000 0.000 0.454 0.800
## .Q140.429 0.046 9.414 0.000 0.429 0.889
## .Q150.560 0.045 12.570 0.000 0.560 0.982
##   .wc 0.028 0.024 1.167 0.243 0.110 0.110
##   .prof 0.055 0.017 3.271 0.001 0.274 0.274
##   .relationship to others 0.112 0.057 1.965 0.049 0.307 0.307
##   aut          0.222 0.028 7.974 0.000 1.000 1.000

```

*# third dimension remains inappropriate*

Also in the hierarchical model, the fit is on the edge. Nevertheless, evidence is found of an overarching autonomy construct (see standardized factor loads from autonomy). However, this third dimension results in far too low standardized factor loads. This model is not usable.

### Model 3: Single dimension

```

fit_1dimo <- cfa(one, data = rb, estimator = "DWLS") summary(fit_1dimo,
fit.measures = T, standardized = T)

```

```

## lavaan 0.6-11 ended normally after 28 iterations ##
##   Estimator          DWLS
##   Optimization method NLMINB
##

```

```

##
##

##      Number of model parameters                30
##
##      Number of observations                    312
##
## Model Test User Model:
##
##      Test statistic                          245.579
##      Degrees of freedom                      90
##      P-value (Chi-square)                   0.000
##
## Model Test Baseline Model:
##
##      Test statistic                          2697.688
##      Degrees of freedom                      105
##      P-value                                0.000
##
## User Model versus Baseline Model:
##
##      Comparative Fit Index (CFI)             0.940
##      Tucker-Lewis Index (TLI)               0.930
##
## Root Mean Square Error of Approximation:
##      RMSEA   0.075 90 Percent confidence interval - lower   0.063
##      90 Percent confidence interval - upper 0.086
##      P-value RMSEA <= 0.05                    0.000
##
## Standardized Root Mean Square Residual:
##
##      SRMR                                0.093
##
## Parameter Estimates:
##
##      Standard errorsStandard
##      Information Expected
##      Information saturated (h1) model      Unstructured
##
## Latent Variables:
##      Estimate Std.Err z-value P(>|z|)      Std.lv Std.all
##      aut =~
##      Q1                1.000                0.468    0.674
## Q2 0.843 0.061 13.708 0.000 0.395 0.594
## Q3 0.872 0.062 14.033 0.000 0.408 0.572
## Q4 0.969 0.065 14.992 0.000 0.454 0.732
## Q5 0.840 0.061 13.855 0.000 0.393 0.574
## Q6 0.895 0.060 14.939 0.000 0.419 0.727
## Q7 0.740 0.052 14.208 0.000 0.346 0.625
## Q8 0.629 0.050 12.629 0.000 0.294 0.479
## Q9 0.742 0.054 13.694 0.000 0.347 0.584

```



```

## Q10 0.857 0.060 14.225 0.000 0.402 0.612
## Q11 1.095 0.084 13.038 0.000 0.513 0.496
## Q12 0.503 0.057 8.823 0.000 0.236 0.282
## Q13 0.589 0.057 10.356 0.000 0.276 0.366
## Q14 0.401 0.049 8.156 0.000 0.188 0.270
## Q15 0.176 0.047 3.713 0.000 0.082 0.109
##
## Variances:
## Estimate Std.Err z-value P(>|z|) Std.lv Std.all

## .Q1 0.263 0.044 6.007 0.000 0.263 0.545

## .Q2 0.286 0.042 6.870 0.000 0.286 0.648

## .Q3 0.342 0.048 7.170 0.000 0.342 0.673

## .Q4 0.179 0.037 4.808 0.000 0.179 0.465

## .Q5 0.314 0.044 7.214 0.000 0.314 0.670

## .Q6 0.156 0.027 5.741 0.000 0.156 0.471
## .Q7 0.187 0.031 6.089 0.000 0.187 0.609
## .Q8 0.291 0.030 9.546 0.000 0.291 0.770
## .Q9 0.233 0.030 7.765 0.000 0.233 0.659
## .Q10 0.270 0.041 6.579 0.000 0.270 0.626
## .Q11 0.805 0.063 12.710 0.000 0.805 0.754
## .Q12 0.642 0.050 12.765 0.000 0.642 0.920
## .Q13 0.491 0.047 10.443 0.000 0.491 0.866
## .Q14 0.448 0.044 10.071 0.000 0.448 0.927
## .Q15 0.563 0.044 12.691 0.000 0.563 0.988
## aut 0.219 0.021 10.548 0.000 1.000 1.000

##

```

##  
##

Again, the model fit is on the edge. Additionally, the standardized factor loads of Q12 up to and including Q15 are far too low.

## Adaptation basic models

### Adaptation 1 : Removal of the third dimension

```
# model met 2 dimensies
dim2 <- '
    wc =~ Q1 + Q2 + Q3 + Q4 + Q5
    prof =~ Q6 + Q7 + Q8 + Q9 + Q10
    '

fit_2dim <- cfa(dim2, data = rb, estimator = "DWLS")
summary(fit_2dim, fit.measures = T, standardized = T)
```

#### Model 1

```
## lavaan 0.6-11 ended normally after 28 iterations ##
##      Estimator                      DWLS
##      Optimization method           NLMINB
##      Number of model parameters      21
##
##      Number of observations          312
##
## Model Test User Model:
##
##      Test statistic                  80.576
##      Degrees of freedom              34
##      P-value (Chi-square)            0.000
##
## Model Test Baseline Model:
##
##      Test statistic                  1956.314
##      Degrees of freedom              45
##      P-value                          0.000
##
## User Model versus Baseline Model:
##
##      Comparative Fit Index (CFI)     0.976
##      Tucker-Lewis Index (TLI) ##    0.968
## Root Mean Square Error of Approximation:
##
##      RMSEA                          0.066
##      90 Percent confidence interval - lower 0.048
##      90 Percent confidence interval - upper 0.085
##      P-value RMSEA <= 0.05           0.072
```

## Standardized Root Mean Square Residual:

##

## SRMR 0.077

##

## Parameter Estimates:

##

## Standard errorsStandard

## Information Expected

## Information saturated (h1) model Unstructured

##

## Latent Variables:

## Estimate Std.Err z-value P(>|z|) Std.lv Std.all

## wc =~

## Q1 1.000 0.501 0.722

## Q2 0.847 0.067 12.568 0.000 0.425 0.638

## Q3 0.851 0.067 12.778 0.000 0.427 0.598

## Q4 0.961 0.071 13.518 0.000 0.482 0.777

## Q5 0.807 0.064 12.520 0.000 0.405 0.591

## prof =~

## Q6 1.000 0.449 0.779

## Q7 0.804 0.059 13.692 0.000 0.361 0.650

## Q8 0.733 0.059 12.384 0.000 0.329 0.535

## Q9 0.867 0.065 13.288 0.000 0.389 0.653

## Q10 0.949 0.072 13.252 0.000 0.426 0.648

##

## Covariances:

## Estimate Std.Err z-value P(>|z|) Std.lv Std.all

## wc ~~

## prof 0.180 0.013 14.338 0.000 0.802 0.802

##

## Variances:

## Estimate Std.Err z-value P(>|z|) Std.lv Std.all

## .Q1 0.231 0.047 4.944 0.000 0.231 0.479

## .Q2 0.262 0.044 6.004 0.000 0.262 0.592

## .Q3 0.327 0.049 6.642 0.000 0.327 0.642

## .Q4 0.153 0.040 3.858 0.000 0.153 0.397

## .Q5 0.305 0.045 6.811 0.000 0.305 0.651

## .Q6 0.131 0.030 4.392 0.000 0.131 0.393

## .Q7 0.177 0.032 5.595 0.000 0.177 0.577

## .Q8 0.269 0.032 8.496 0.000 0.269 0.713

## .Q9 0.203 0.032 6.333 0.000 0.203 0.573

## .Q10 0.250 0.043 5.874 0.000 0.250 0.580

## wc 0.251 0.026 9.522 0.000 1.000 1.000

## prof 0.201 0.019 10.454 0.000 1.000 1.000

# fit ok

The removal of the third dimension (relationship with others) results in an acceptable model fit with acceptable standardised factor loads.

```
# hierarchisch model
hier2 <- '
  wc =~ Q1 + Q2 + Q3 + Q4 + Q5 prof
  =~ Q6 + Q7 + Q8 + Q9 + Q10 aut =~
  wc + prof
'

fit_hier2 <- cfa(hier2, data = rb, estimator = "DWLS") summary(fit_hier2, fit.measures
= T)
```

## Model 2: Hierarchic model without relationship with others

## lavaan 0.6-11 ended normally after 27 iterations

```
##
##      Estimator                      DWLS
##      Optimization method          NLMINB
##      Number of model parameters      22
##
##      Number of observations          312
##
## Model Test User Model:
##
##      Test statistic                  80.576
##      Degrees of freedom              33
##      P-value (Chi-square) ##        0.000
## Model Test Baseline Model:
##
##      Test statistic                  1956.314
##      Degrees of freedom              45
##      P-value                        0.000
##
## User Model versus Baseline Model:
##
##      Comparative Fit Index (CFI)      0.975
##      Tucker-Lewis Index (TLI) ##     0.966
## Root Mean Square Error of Approximation:
##
##      RMSEA                        0.068
##      90 Percent confidence interval - lower 0.049
##      90 Percent confidence interval - upper 0.087
##      P-value RMSEA <= 0.05          0.056
##
## Standardized Root Mean Square Residual:
##
```

```

## SRMR                                0.077
##
## Parameter Estimates:
##
## Standard errors                      Standard
## Information                        Expected
## Information saturated (h1) model      Unstructured
## Latent Variables:
## Estimate Std.Err z-value P(>|z|)
## wc =~
## Q1 1.000
## Q2 0.847 NA
## Q3 0.851 NA
## Q4 0.961 NA
## Q5 0.807 NA
## prof =~
## Q6 1.000
## Q7 0.804 NA
## Q8 0.733 NA
## Q9 0.867 NA
## Q10 0.949 NA
## aut =~
## wc 1.000
## prof 0.993 NA
##
## Variances:
## Estimate Std.Err z-value P(>|z|)
## .Q1 0.231 NA
## .Q2 0.262 NA
## .Q3 0.327 NA
## .Q4 0.153 NA
## .Q5 0.305 NA
## .Q6 0.131 NA
## .Q7 0.177 NA
## .Q8 0.269 NA
## .Q9 0.203 NA
## .Q10 0.250 NA ## .wc 0.070 NA
## .prof 0.022 NA
## aut 0.182 NA

```

This model has a good fit, but comprises too few observations to calculate all the necessary parameters. Therefore, the result cannot be evaluated.

```
# single dimension
one2 <- '
    one =~ Q1 + Q2 + Q3 + Q4 + Q5 + Q6 + Q7 + Q8 + Q9 + Q10
    ,
    fit_one2 <- cfa(one2, data = rb, estimator = "DWLS")
    summary(fit_one2, fit.measures = T, standardized = T)
```

### Model 3: Single factor CFA without relationship with others

```
## lavaan 0.6-11 ended normally after 26 iterations
##
##      Estimator                      DWLS
##      Optimization method          NLMINB
##      Number of model parameters      20
##
##      Number of observations          312
##
## Model Test User Model:
##
##      Test statistic    102.536 ##      Degrees of freedom    35
##      P-value (Chi-square)                      0.000
##
## Model Test Baseline Model:
##
##      Test statistic    1956.314 ##      Degrees of freedom    45
##      P-value                      0.000
##
## User Model versus Baseline Model:
##
##      Comparative Fit Index (CFI)    0.965 ##      Tucker-Lewis Index (TLI)
0.955
##
## Root Mean Square Error of Approximation:
##
##      RMSEA 0.079
##      90 Percent confidence interval - lower 0.061
##      90 Percent confidence interval - upper 0.097
##      P-value RMSEA <= 0.05                      0.004
##
## Standardized Root Mean Square Residual:
##
##      SRMR                      0.089
##
## Parameter Estimates:
##
##      Standard errorsStandard
##      Information      Expected
```

```

##      Information saturated (h1) model      Unstructured
##
## Latent Variables:
##              Estimate Std.Err z-value P(>|z|)      Std.lv Std.all
##      one =~
## Q1 1.000              0.465              0.669
## Q2 0.851 0.068 12.593 0.000 0.395 0.594
## Q3 0.860 0.067 12.875 0.000 0.400 0.560
## Q4 0.991 0.072 13.739 0.000 0.460 0.742
## Q5 0.820 0.065 12.637 0.000 0.381 0.556
## Q6 0.920 0.067 13.727 0.000 0.427 0.742
## Q7 0.743 0.057 13.056 0.000 0.345 0.622
## Q8 0.654 0.055 11.818 0.000 0.304 0.495
## Q9 0.769 0.060 12.743 0.000 0.357 0.601
## Q10 0.863 0.066 13.132 0.000 0.401 0.610
## ## Variances:
##              Estimate Std.Err z-value P(>|z|)      Std.lv Std.all
##.Q1 0.267 0.045 5.991 0.000 0.267 0.553
##.Q2 0.286 0.042 6.762 0.000 0.286 0.647
##.Q3 0.349 0.048 7.271 0.000 0.349 0.686
##.Q4 0.173 0.038 4.530 0.000 0.173 0.450
##.Q5 0.324 0.044 7.398 0.000 0.324 0.691
##.Q6 0.149 0.028 5.285 0.000 0.149 0.449
##.Q7 0.188 0.031 6.060 0.000 0.188 0.613
##.Q8 0.285 0.031 9.221 0.000 0.285 0.755
##.Q9 0.226 0.031 7.371 0.000 0.226 0.639
##.Q100.270 0.041 6.523 0.000 0.270 0.627
## one0.216 0.022 9.696 0.000 1.000 1.000

```

When the items of relationship with others are removed in the single factor model a good model fit is found. Also, standardized factor loads are satisfactory.

### Additional analyses

Additional analyses were carried out to determine if satisfactory results could be obtained with more complicated CFA's.

For example, a two-group CFA looked at whether better results were obtained if participants were divided into groups based on language. This turned out not to be the case.

In addition, a subset of the relationship with others items was worked on, but this too did not produce any better results

Finally, a two-group CFA was used to explore whether a better result could be obtained if participants were divided into primary care midwives and midwives working in a hospital, but this neither did produce any better results

### Conclusion

Based on this analysis, it can be concluded that the first and second dimensions can be used in their present form. The scales of both work content and professionalism of the midwife are internally consistent, which is a measure of

scale reliability. Regarding the scale of relationship with others, we cannot confirm internal consistency. The items are too heterogeneous which makes the scale not internally consistent and therefore far too low Cronbach's alpha's were found. Conversely, an overarching construct (with all items belonging to 1 single scale namely autonomy) did provide good internal consistency.

Regarding construct validity, in the models with the three dimensions too low standardized factor loads for relationship to others are consequently observed, which means that the proposed items are not good indicators of this latent scale. Good model fits were obtained when we omit the relationship with others items from the model. Even then the standardized factor loads were always  $> .50$ .

Alternatively, autonomy can be measured by means of a single factor model (use all items as a measure for autonomy). Again, this model resulted in appropriate results when the items of relationship with others were removed.

1. R Development Core Team 2004. R: A language and environment for statistical computing. R Foundation for Statistical Computing, Vienna.
2. Revelle W. psych: Procedures for personality and psychological research. 2017.
3. Polit D, Beck C. Essentials of nursing research: Appraising evidence for nursing practice: Lippincott Williams & Wilkins; 2009.
4. Rosseel Y. Lavaan: An R package for structural equation modeling and more. Version 0.5–12 (BETA). *Journal of statistical software* 2012; **48**(2): 1-36.
5. Bentler PM. EQS structural equations program manual. Los Angeles: BMDP Statistical Software. Inc BentlerEQS: *Structural Equations Program Manual*1989 1989.
6. Cook WL. A structural equation model of dyadic relationships within the family system. *Journal of Consulting and Clinical Psychology* 1994; **62**(3): 500-9.
7. Kenny DA. Measuring model fit. 2015. <http://davidakenny.net/cm/fit.htm>.
8. Kline RB. Principles and practice of structural equation modeling, 3rd ed. New York, NY, US: Guilford Press; 2011.
